# Supplementary material for: Alfalfa MsSOS2 confers salinity tolerance by promoting lateral root growth and regulating Na+/K+ homeostasis
Source: Research Square preprint supplement (doi:10.21203/rs.3.rs-6908540/v1), 2025-07-25
Supplement: Supplementary file 1 [file fa569f0261a417c6e39b7df7.pdf]

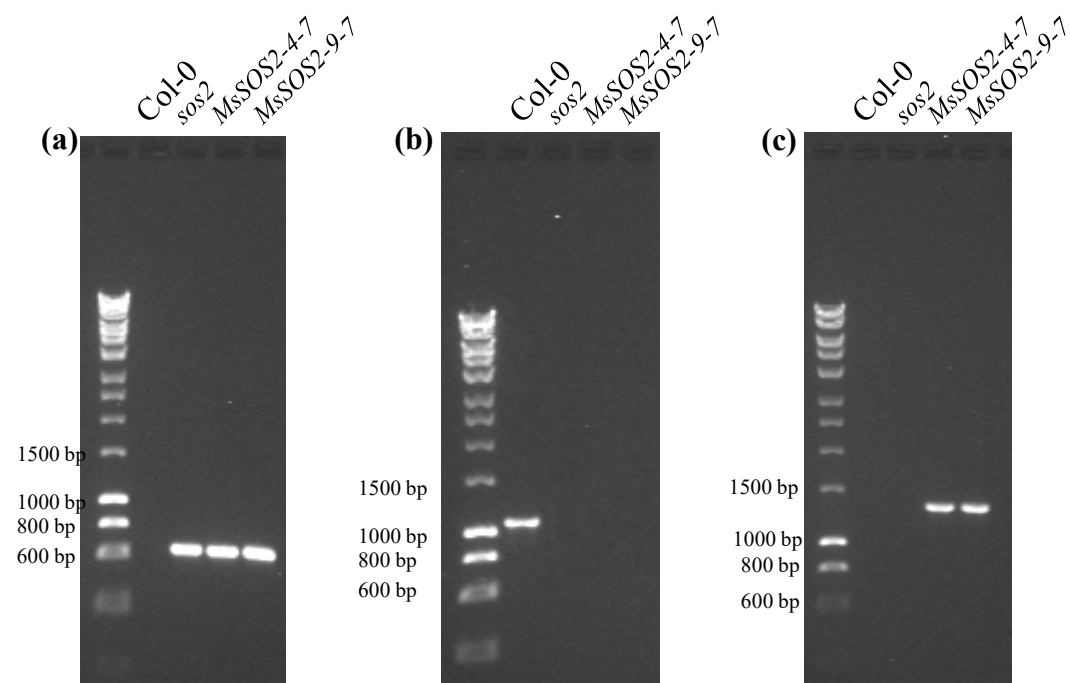

**Figure S1.** Verification of plant genotypes by genotyping PCR. (a) The *sos2* mutant background was confirmed by amplifying a T-DNA insertion-specific product using LBb1.3 and Salk\_056101RP primers. (b) The Col-0 (WT) background was confirmed by genotyping PCR using Salk\_056101LP and Salk\_056101RP primers. (c) *MsSOS2* transgenic lines were verified by genotyping PCR using *MsSOS2*-specific forward and reverse primers (Table S1).
